# Supplementary material for: Characterization of changes in the electronic structure of platinum sub-nanoclusters supported on graphene induced by oxygen adsorption
Source: Royal Society of Chemistry journal article supplement (doi:10.1039/d4cp00555d), 2024-01-01
Supplement: d4cp00555d1.pdf [file d4cp00555d1.pdf]

## Supporting Information

### Characterization of changes in the electronic structure of platinum sub-nanoclusters supported on graphene induced by oxygen adsorption

Hinoki Hirase<sup>a</sup>, Kenji Iida<sup>\*,a</sup>, and Jun-ya Hasegawa<sup>\*,a,b</sup>

<sup>a</sup> Institute for Catalysis, Hokkaido University, N21 W10 Kita-ku, Sapporo, 001-0021 Hokkaido, Japan.

<sup>b</sup> Interdisciplinary Research Center for Catalytic Chemistry, National Institute of Advanced Industrial Science and Technology, Central 5, 1-1-1 Higashi, Tsukuba, Ibaraki 305-8565, Japan.

#### S1 Geometrical Structures

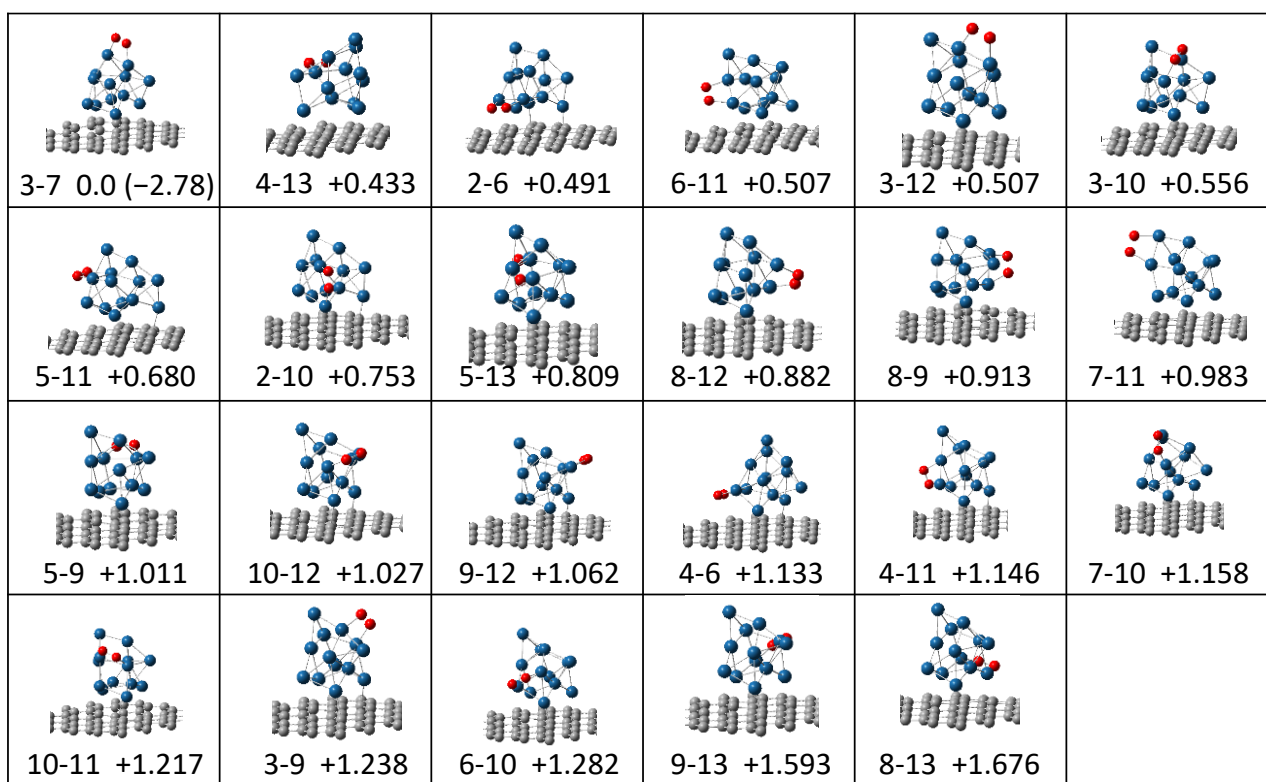

Figure S1. Side view of the heterostructures consisting of O<sub>2</sub>, Pt<sub>13</sub>, and a graphene monolayer. For example, the model labelled "3-7" means that two oxygen atoms are adsorbed on 3th and 7th Pt atoms, where the numbering of Pt atoms is shown in Figure 1 in the main manuscript. The number in parenthesis is the energy (eV) relative to that of the 3-7 model.

## S2 Atomic Charge

(a) 3-10

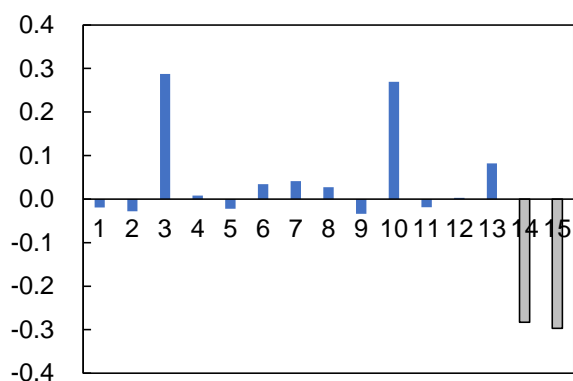

(b) 7-11

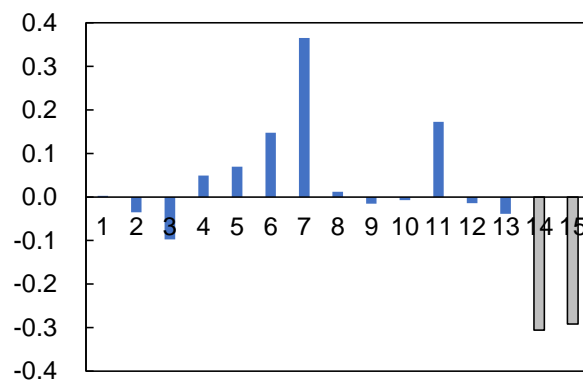

(c) 10-12

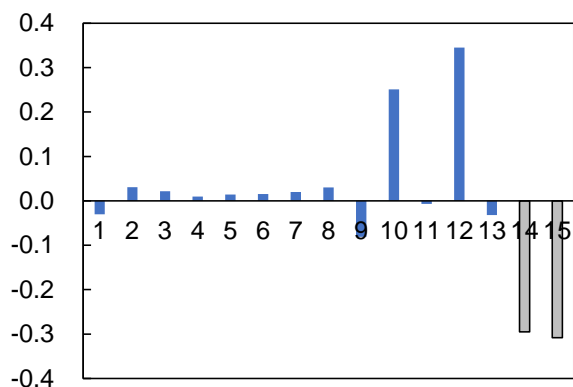

(d) 8-13

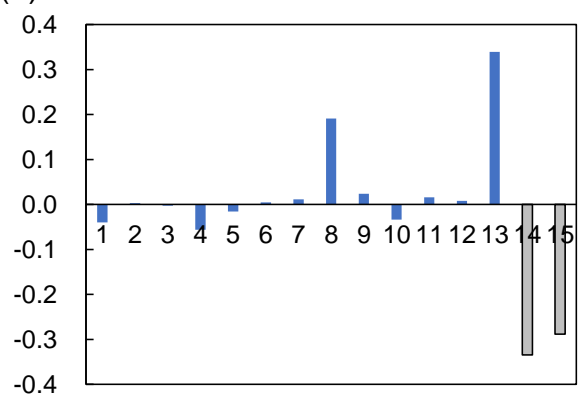

(e) Pt<sub>2</sub>

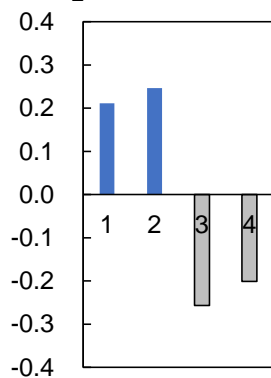

(f) Pt slab

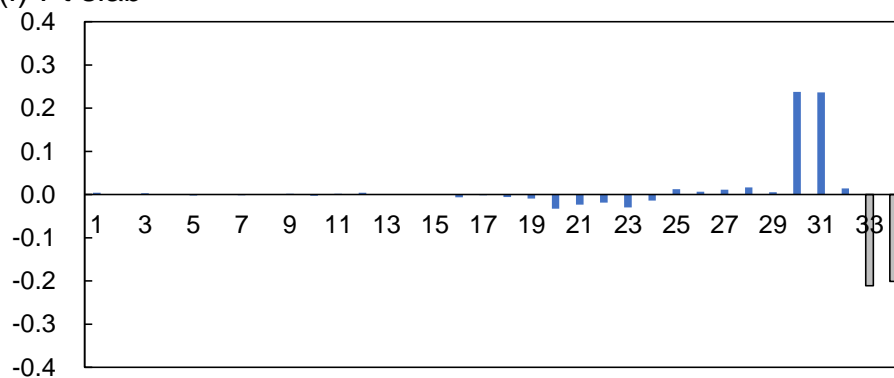

Figure S2. Change in Bader charge by O<sub>2</sub> adsorption onto the adsorption sites of (a) 3-12, (b) 7-11, (c) 10-12, and (d) 8-13 models, respectively. The results of Pt<sub>2</sub> and Pt slab are also shown in (e) and (f). The last two gray bars (14th and 15th for (a)-(d), 3rd and 4th for (d), and 33rd and 34th for (f)) are the results of the two O atoms. The numbering of Pt atoms in (a)-(e) is shown in Figure 1 in the main manuscript.

### S3 Total Density of States

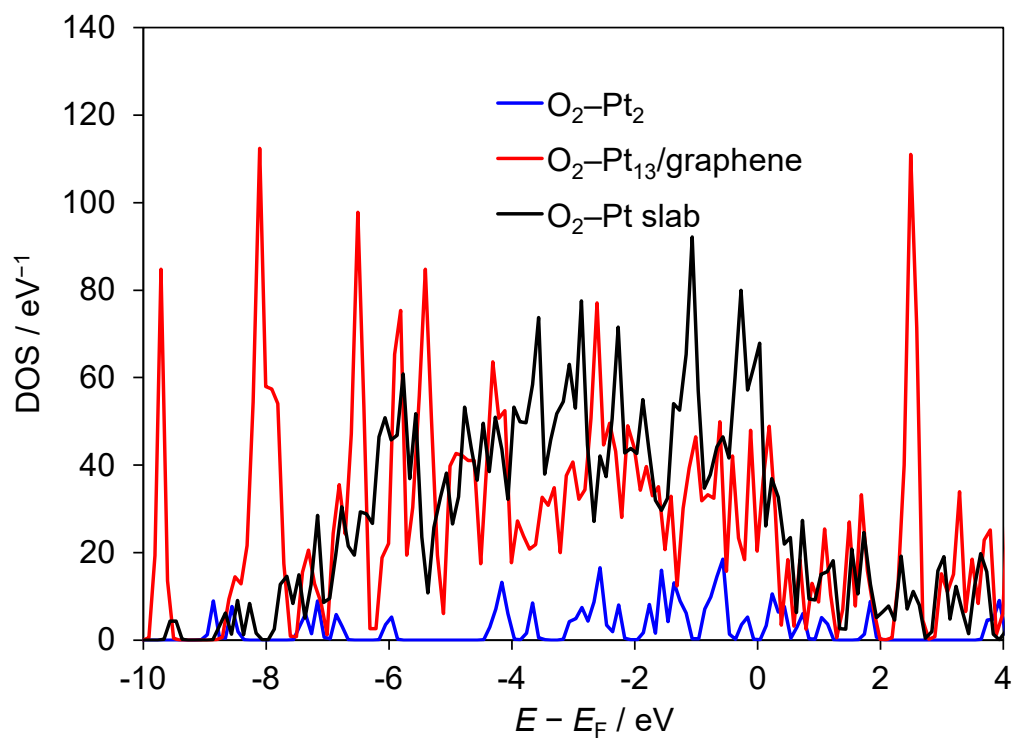

Figure S3. Total density of state for Pt<sub>2</sub>, Pt<sub>13</sub> and Pt slab models before O<sub>2</sub> adsorption.

## S4 Coordination Number

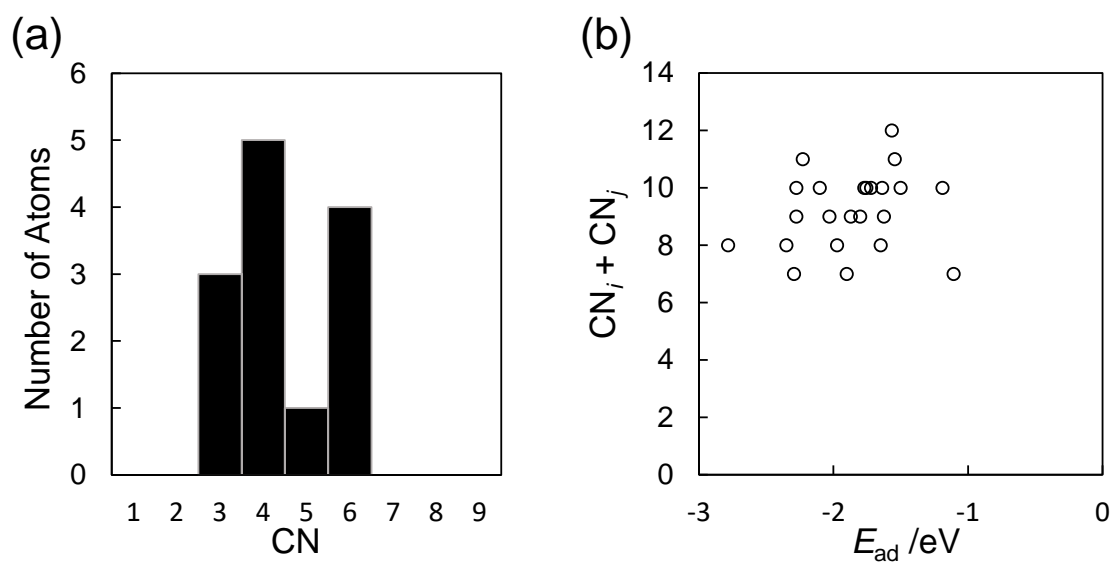

Figure S4. (a) Distribution of the coordination number (CN) before O<sub>2</sub> adsorption and (b) relationship between  $E_{ad}$  and the sum of CNs for Pt atoms at adsorption sites *i* and *j*.

## S5 Relationship of Geometric and Electronic Structure Changes

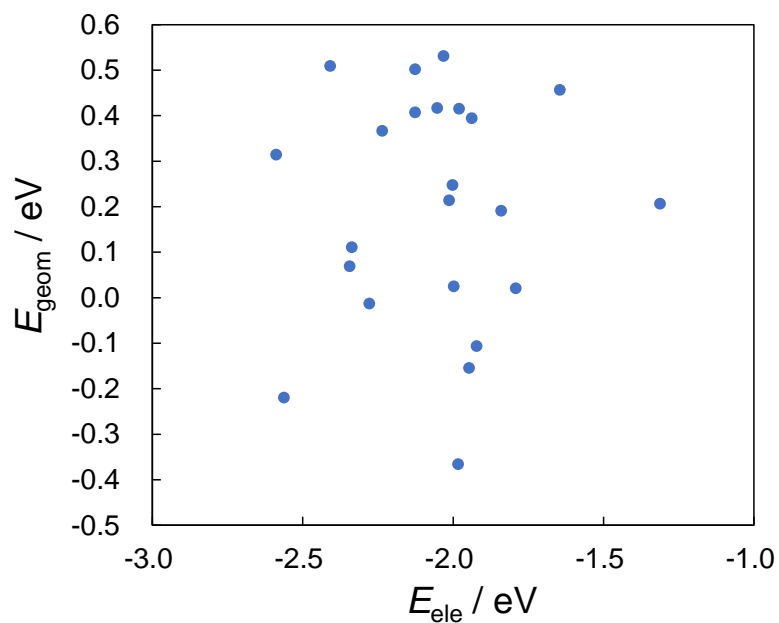

Figure S5. Relationship between the contribution of changes in geometric and electronic structures to the adsorption energy.

## S6 Local Density of States

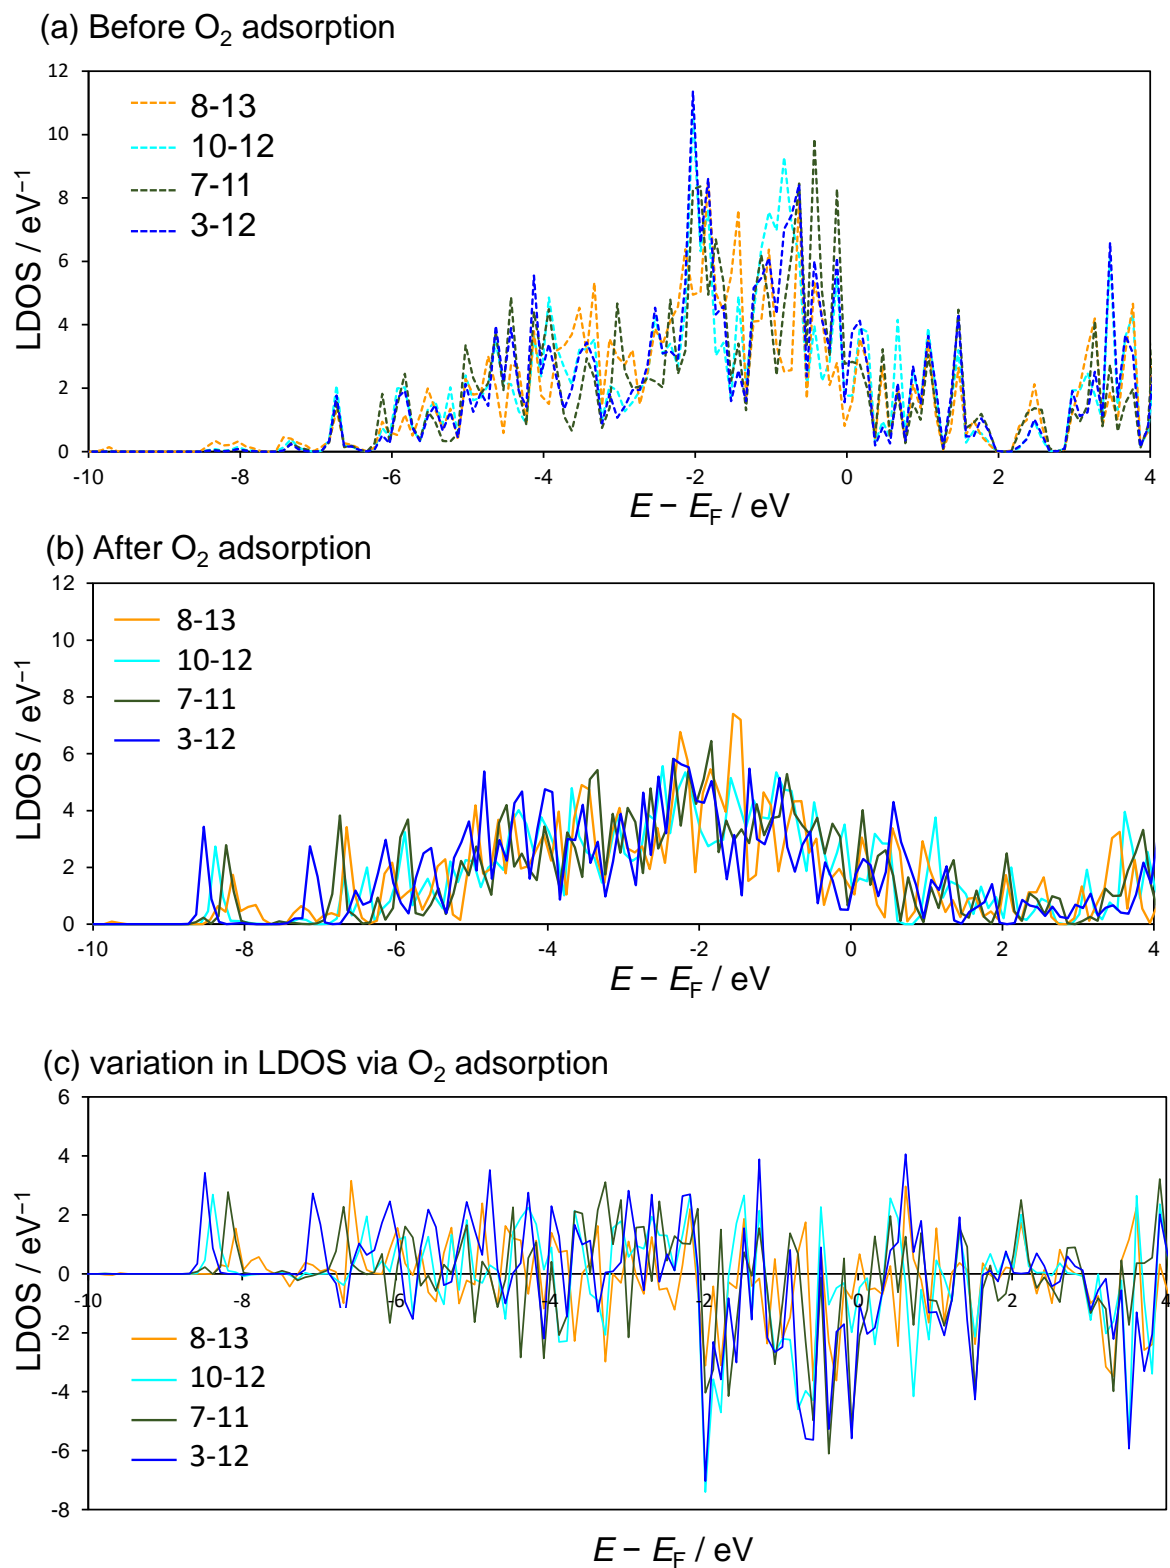

Figure S6. Local density of states (a) before and (b) after O<sub>2</sub> adsorption, and (c) the difference between (a) and (b). The labeling of Pt atoms is shown in Figure 1 in the main manuscript.

## S7 Atomic-Scale Analysis of the Electronic Structure of Pt

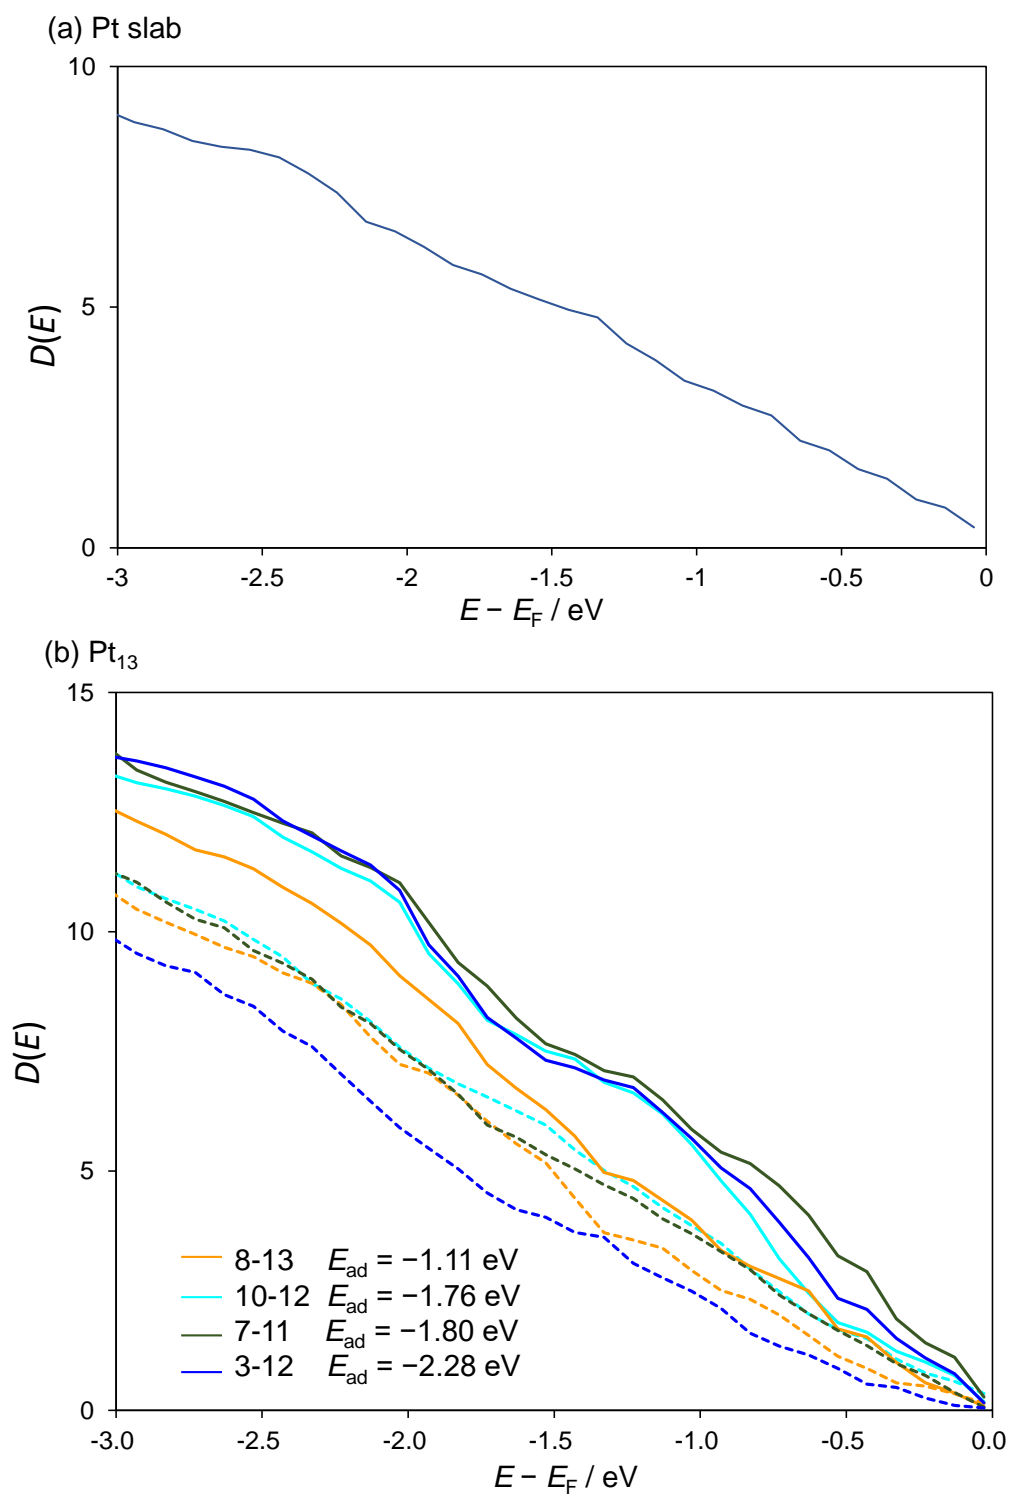

Figure S7. Integrated local density of states,  $D(E)$ , of the Pt moiety in the (a) Pt slab, and (b) Pt<sub>13</sub>–graphene heterostructure before (solid) and after (dashed) O<sub>2</sub> adsorption. The numbering of Pt atoms is shown in Figure 1 in the main manuscript.

## S8 Atomic-Scale Analysis of the Electronic Structure of Pt

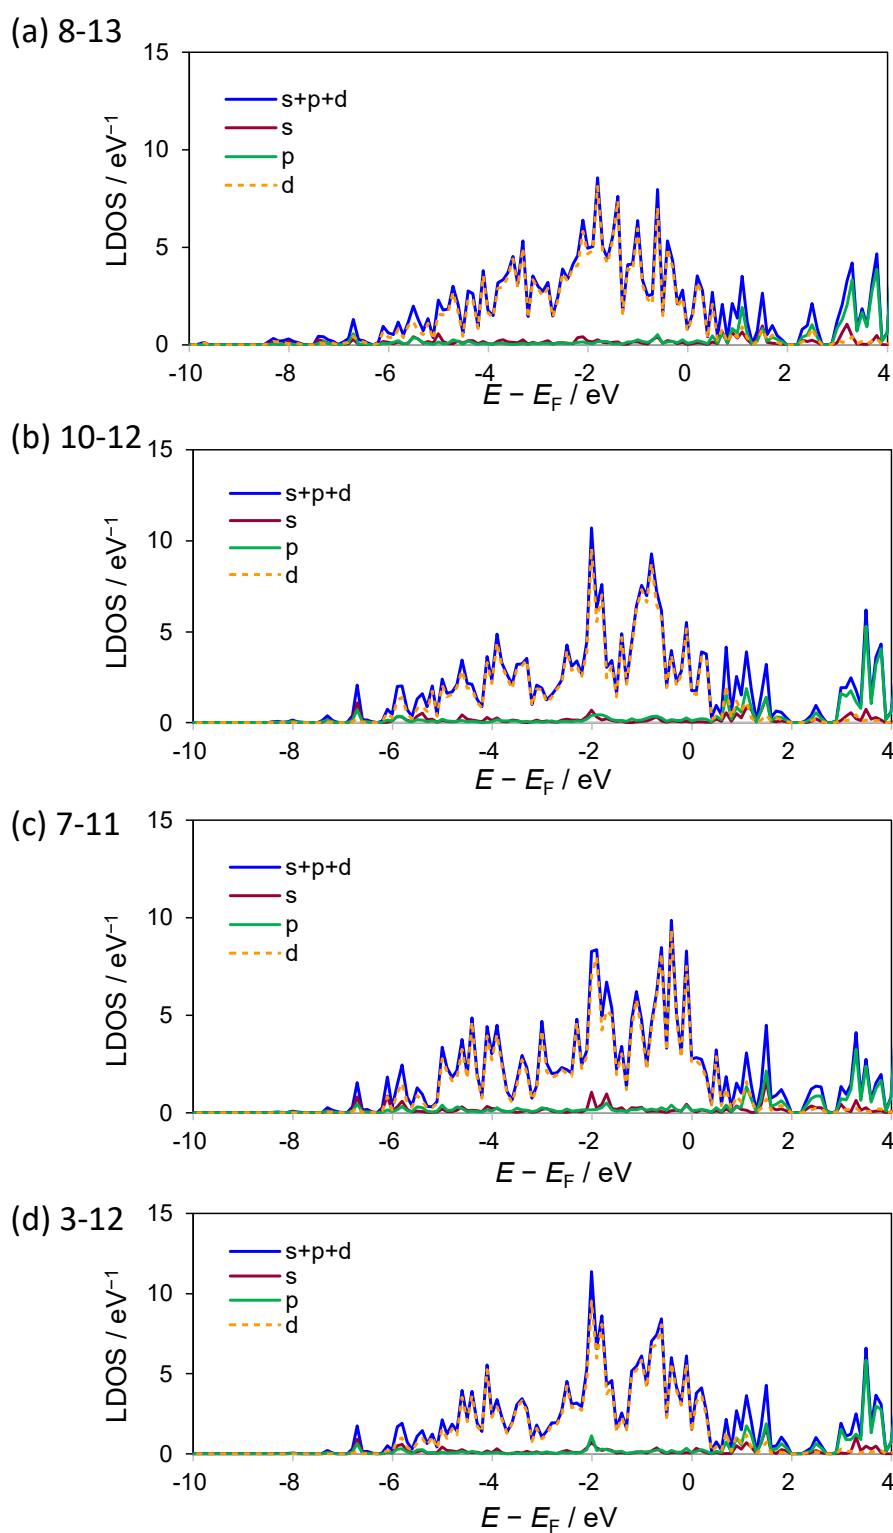

Figure S8. Local density of states of the four O<sub>2</sub> adsorption sites of the Pt<sub>13</sub> model and their s, p, and d components before O<sub>2</sub> adsorption.

## S9 Local Density of States after O<sub>2</sub> adsorption

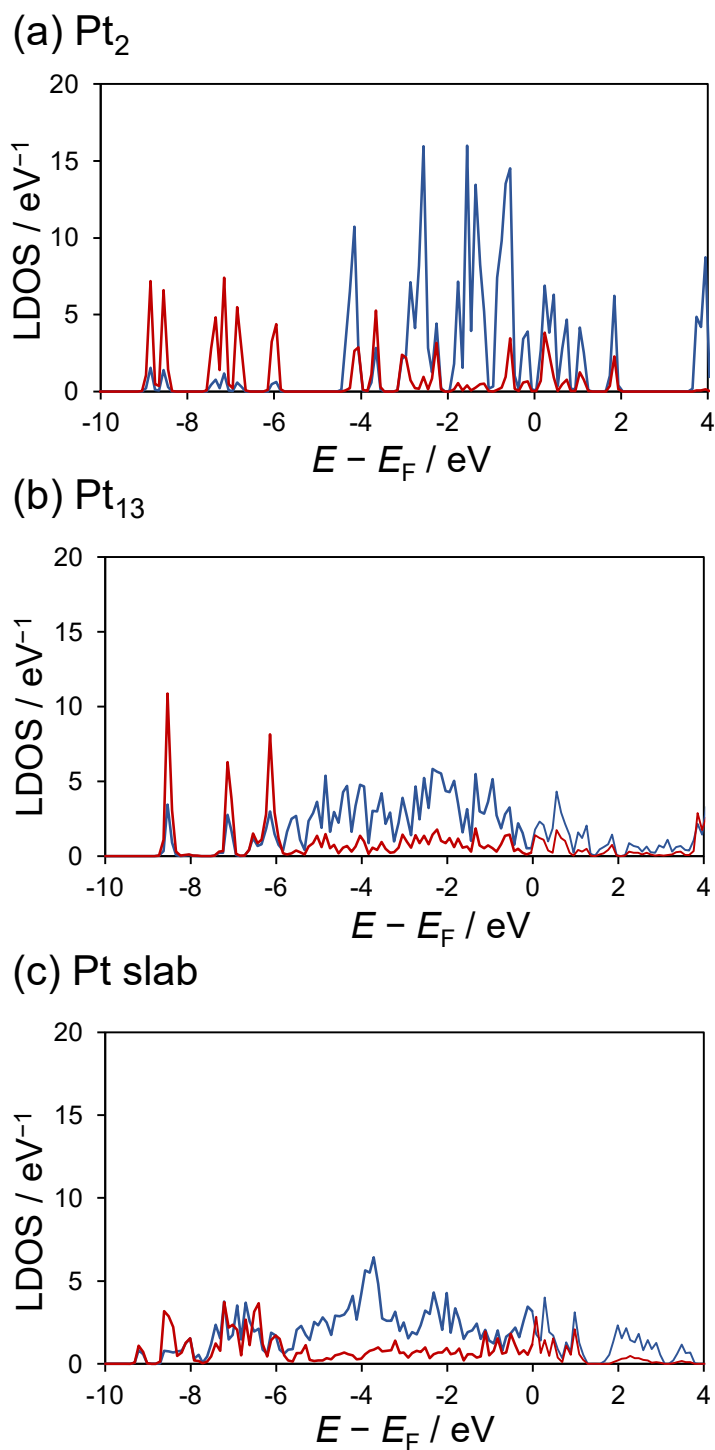

Fig. 9 Local density of states (LDOS) of the Pt (blue) and O<sub>2</sub> (red) moieties after O<sub>2</sub> adsorption for the (a) Pt<sub>2</sub>, (b) Pt<sub>13</sub>/graphene heterostructure, and (c) Pt slab. The band energy is given as the energy difference from the Fermi level energy,  $E_F$ . The selected Pt atoms are labeled as 3 and 7 in Figure 1 in the main manuscript.



### S10 Dependence of Charge on the Adsorption Energy

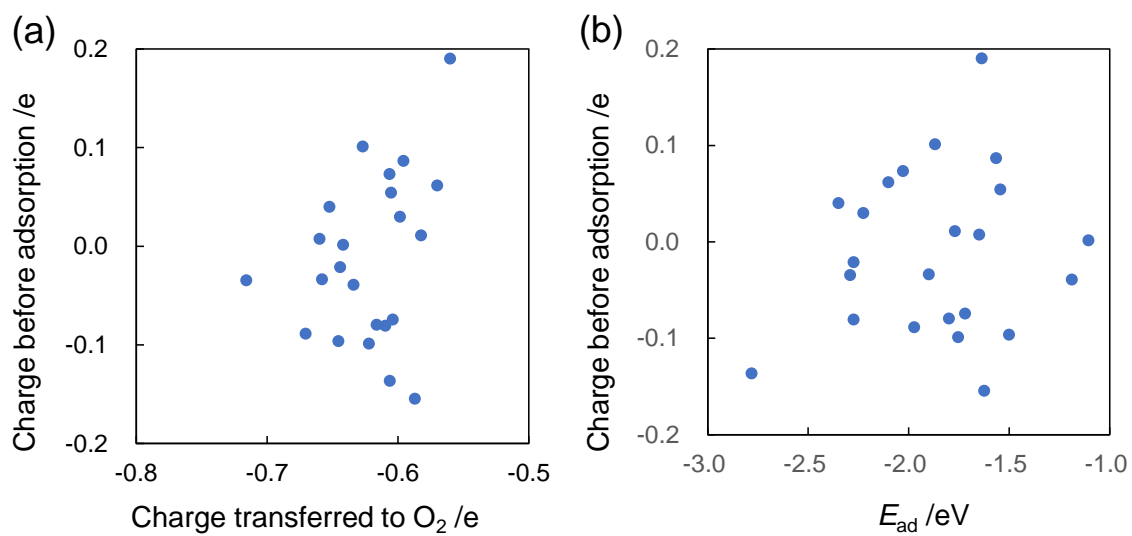

Figure S10. Electronic charge on the two Pt atoms involved in Pt-O bond formation depending on the (a) charge transferred to O<sub>2</sub> and (b) adsorption energy.
